# Supplementary material
Source: publisher site journal article supplement (https://www.dovepress.com/article/498872)
Supplement: Supplementary file 1 [file get_supplementary_file.php]

Supplementary Table**.** Subject reported outcomes and quality of life after water vapor treatment - index cohort

| Questionnaire  Assessment  N=15 | Baseline | At 6 months | At 12 months |
| --- | --- | --- | --- |
| I-PSS, all scores a | 7.9 ± 5.0 [2 - 20] | 5.1 ± 4.6 [0 - 18] | 5.8 ± 4.0 [1.0, 14.0] |
| I-PSS QOL a | 2.2 ± 1.3 [0 - 4] | 1.3 ± 1.5 [0 - 5] | 19.6 ± 17.1 [0.0, 50.0] |
| IIEF-EF score b | 18.7 ± 11.7 [1 - 30] | 15.1± 11.8 [1 - 30] | 15.5 ± 11.4 [1.0, 30.0] |
| MSQH-EjD function b | 10.1 ± 3.0 [1 - 15] | 6.3 ± 4.9 [1 - 15] | 5.9 ± 5.0 [1.0, 15.0] |
| MSQH-bother a | 1.5 ± 1.3 [0 - 44] | 2.1 ± 1.2 [0 - 5] | 1.8 ± 1.0 [0.0, 3.0] |
| EPIC-32 domains |  | | |
| Urinary b | 83.8 ± 11.3 [61.1 - 100] | 87.1 ± 15.3 [40 - 100] | 87.0 ± 16.3 [45.1- 100.0] |
| Bowel b | 92.3 ± 8.0 [71.4 -100] | 94.6 ± 8.6 [66.1 - 100] | 91.8 ± 10.3 [64.3 -100.0] |
| Sexual b | 59.3 ± 22.6 [5.8 - 82.7] | 46.9 ± 28.1 [0 - 86.5] | 51.2 ± 24.9 [7.7 - 80.8] |
| Hormonal b | 93.5 ± 5.8 [77.3 -100] | 95.0 ± 7.6 [75 - 100] | 93.8 ± 6.3 [77.3 - 100.0] |
| Pelvic pain score a | 0.4 ± 0.9 (0 - 3] | 0.5 ±1.6 [0 - 6] | NA |

| Results presented as mean ± SD [range]  a Lower score at a single point in time = better  b Higher score at a single point in time = better  Abbreviations: I-PSS, International Prostate Symptom Score; IIEF-EF, International Index of Erectile Function; MSHQ-EjD, Male Sexual Health Questionnaire-Ejaculatory Dysfunction and Bother; EPIC-32, Expanded Prostate Cancer Index Composite for health related QOL associated with prostate cancer treatment.12 |
| --- |
